# Supplementary material for: The genomic basis of adaptation to the fitness cost of rifampicin resistance in Pseudomonas aeruginosa
Source: PubMed Central journal article supplement (PMC4721101; doi:10.1098/rspb.2015.2452), 2016-01-13
Supplement: rspb20152452supp3.pdf [file rspb20152452supp3.pdf]

## Figure S1, Electronic Supplementary Material

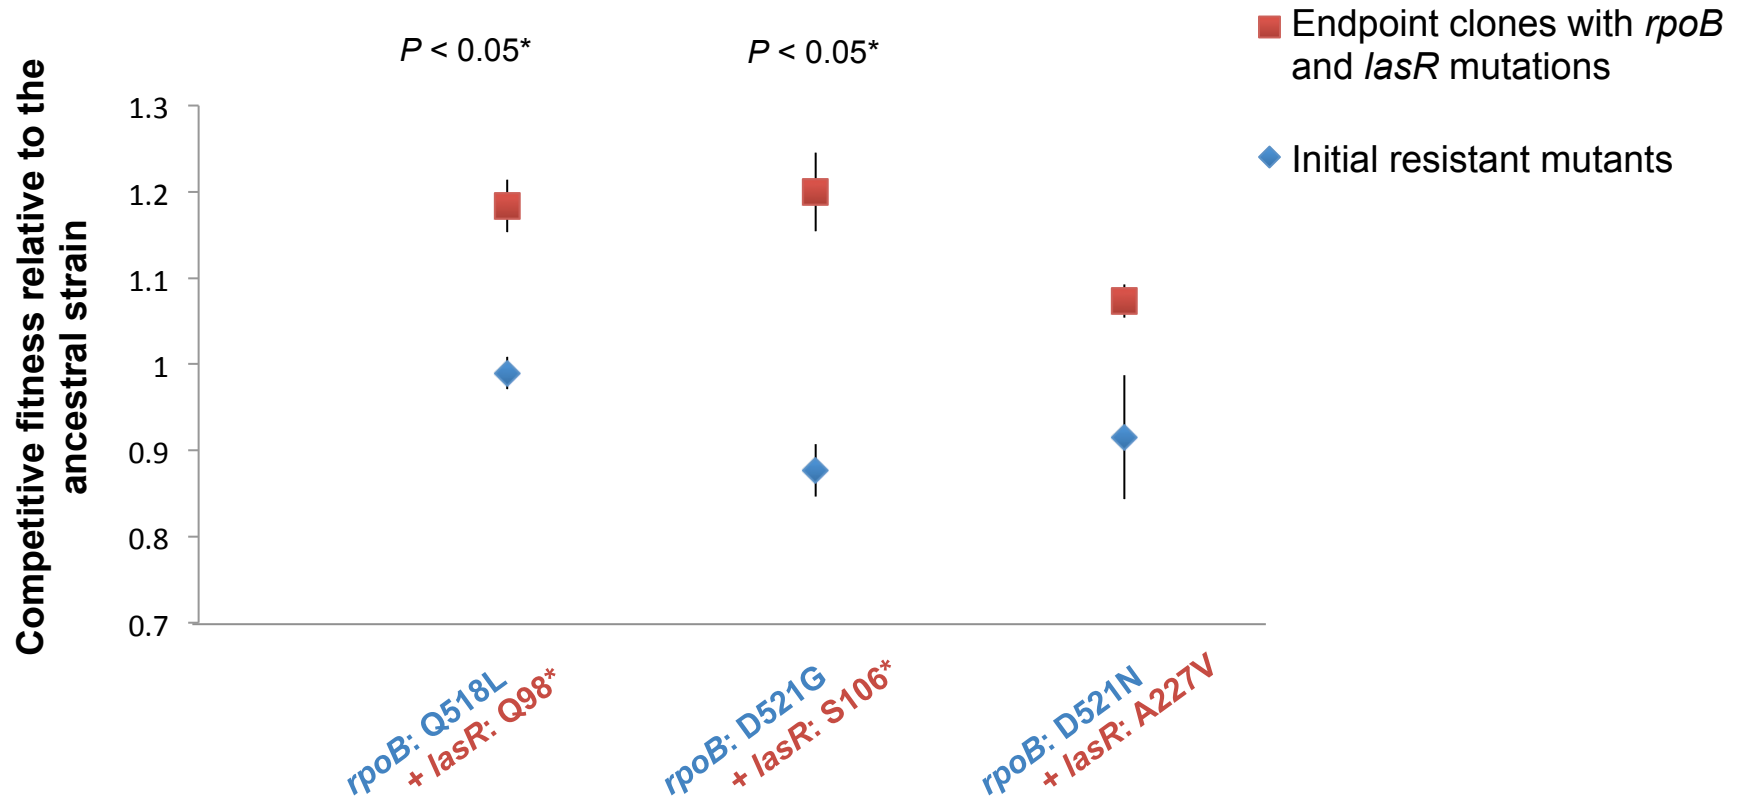

**Figure S1: *lasR* mutations are beneficial.**

The competitive fitness (mean  $\pm$  s.e;  $n=3$ ) of three initial *rpoB* mutants (blue diamonds) and three evolved endpoint clones (red squares) with single point mutations in the *lasR* gene were determined relative to the rifampicin-sensitive ancestral strain. Stop-gain mutations in *lasR* are denoted by the \* symbol. All three evolved endpoint clones showed an increase in average competitive fitness compared to their ancestral *rpoB* mutants, two of which are statistically significant (two-sample t-test,  $P < 0.05$ ).
